# Supplementary material
Source: PubMed Central journal article supplement (PMC4452457)

A

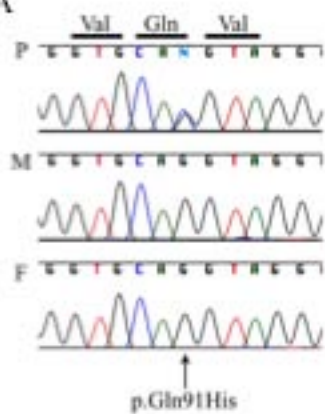

B

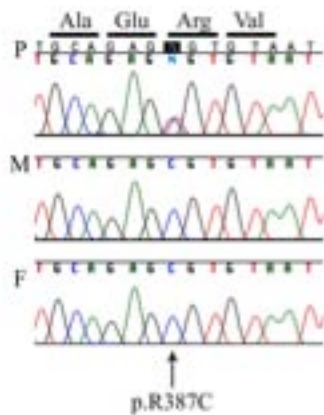

C

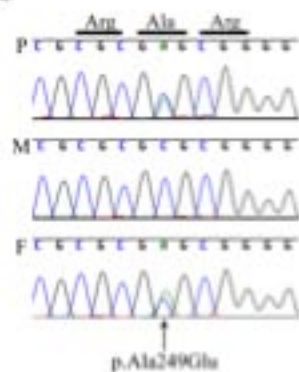

Supplement: NIHMS651942-supplement-Supp_FigureS1-S2.pdf [file NIHMS651942-supplement-Supp_FigureS1-S2.pdf]
